# Supplementary material
Source: PubMed Central journal article supplement (PMC4470374)

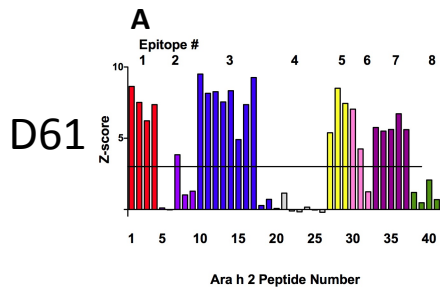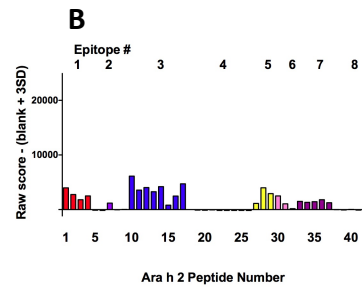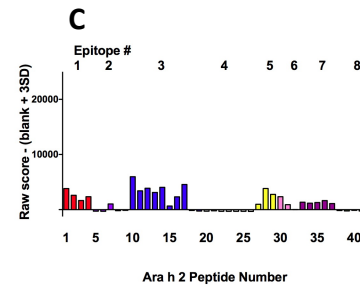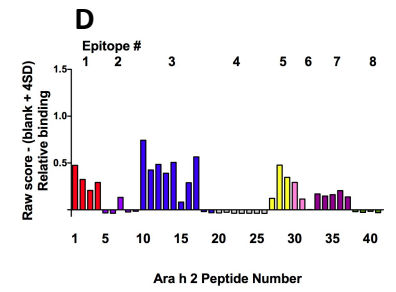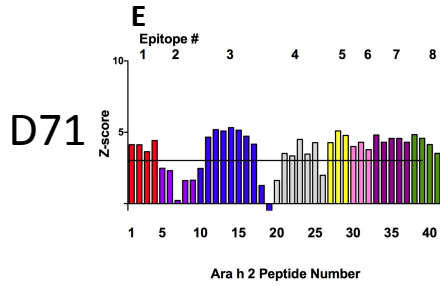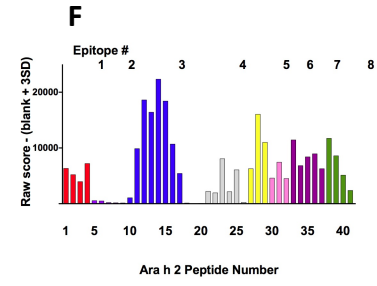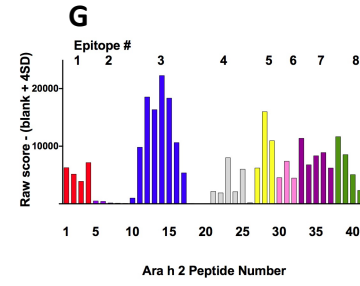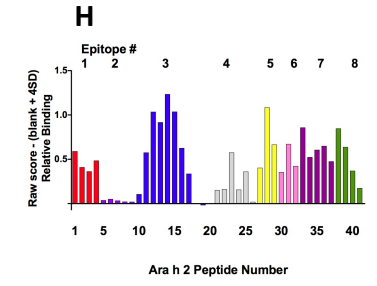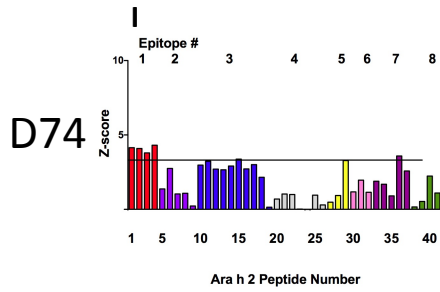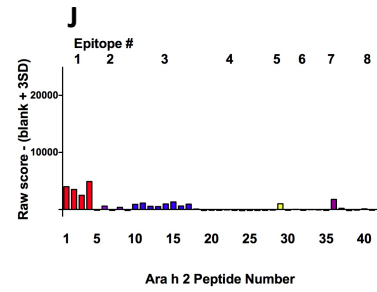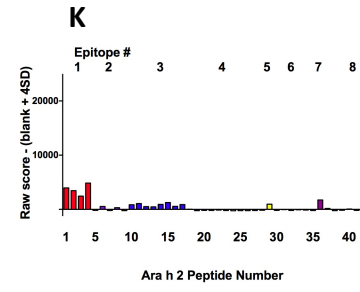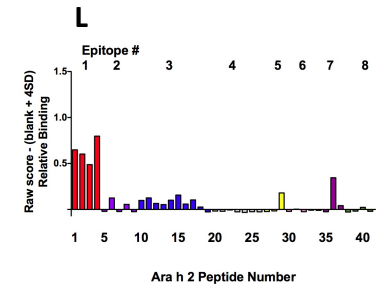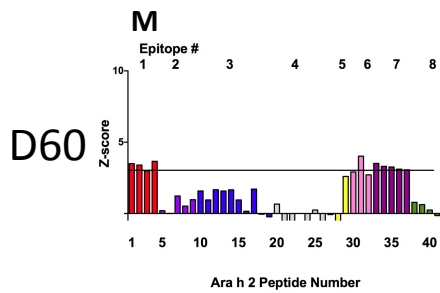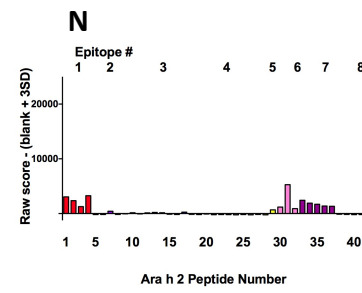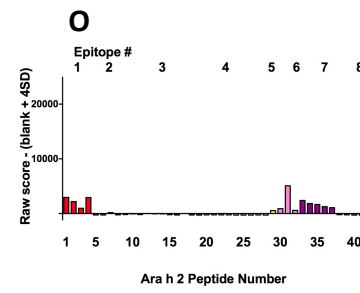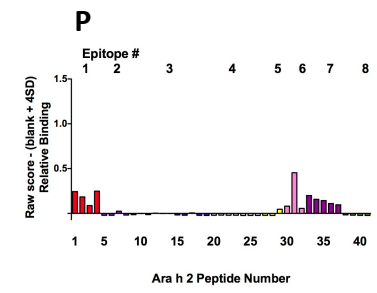

Supplement: NIHMS692814-supplement-n.pdf [file NIHMS692814-supplement-n.pdf]

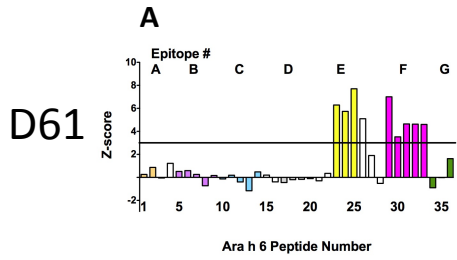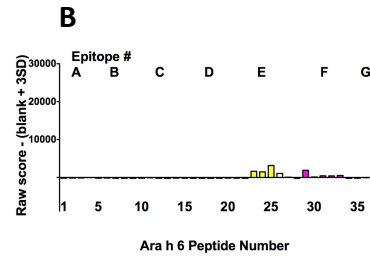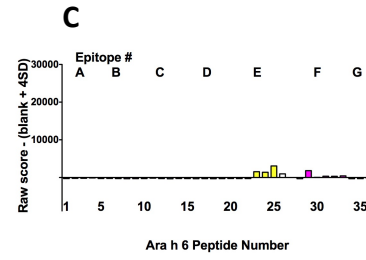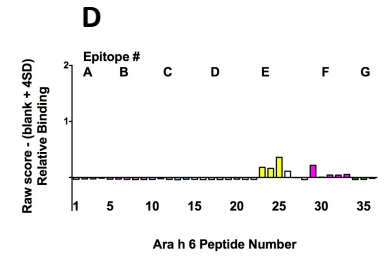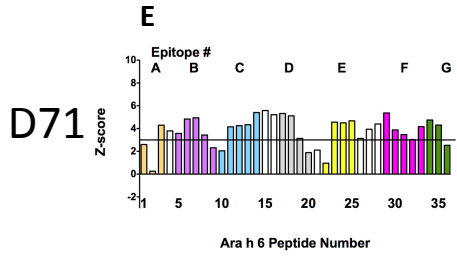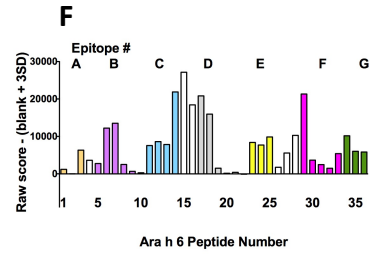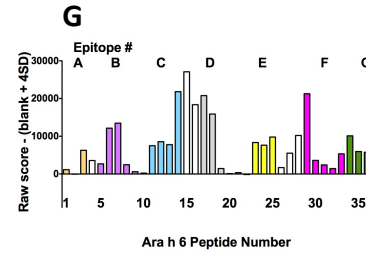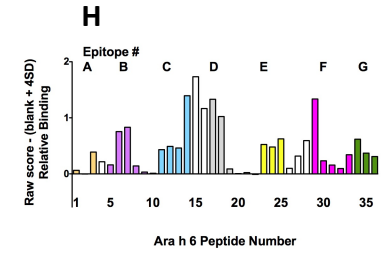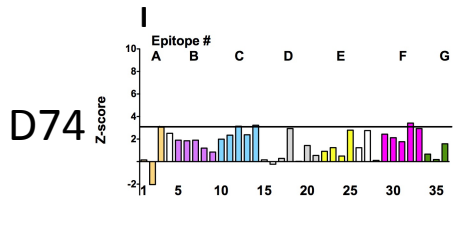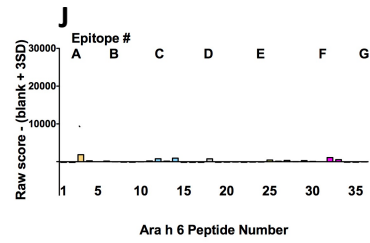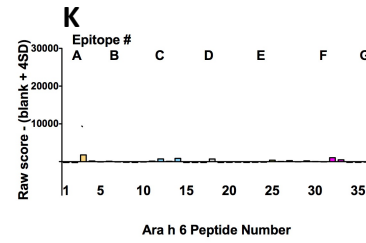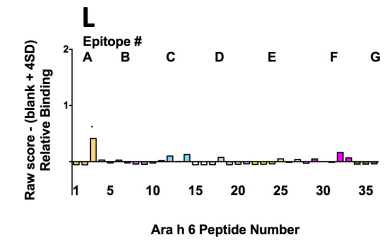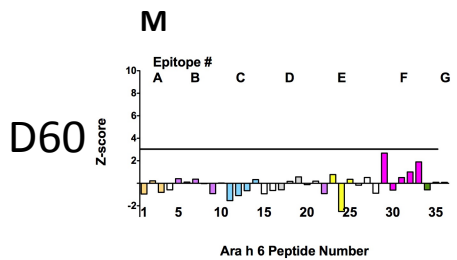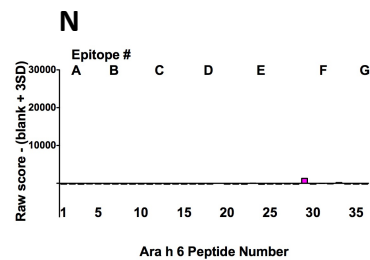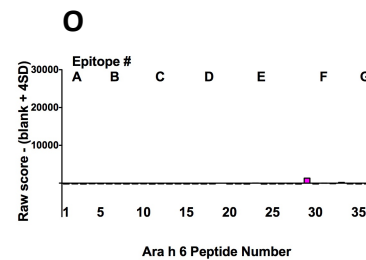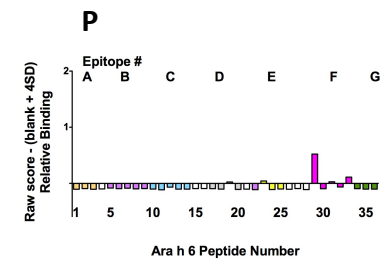

Supplement: NIHMS692814-supplement-o.pdf [file NIHMS692814-supplement-o.pdf]

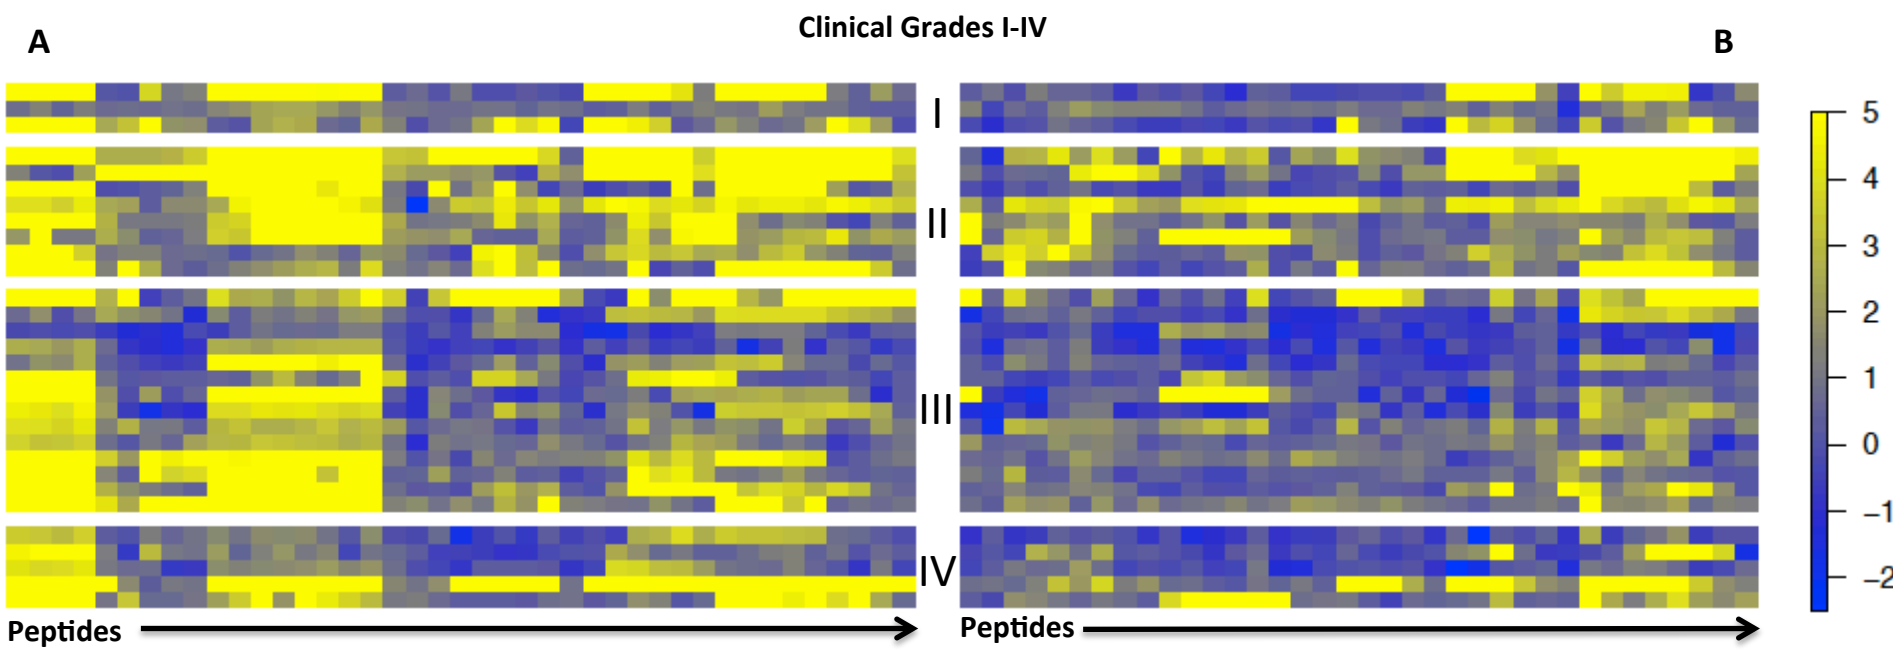

Supplement: NIHMS692814-supplement-p.pdf [file NIHMS692814-supplement-p.pdf]

**A**

Color Key

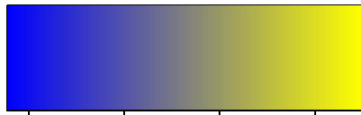

-2

0

2

4

Value

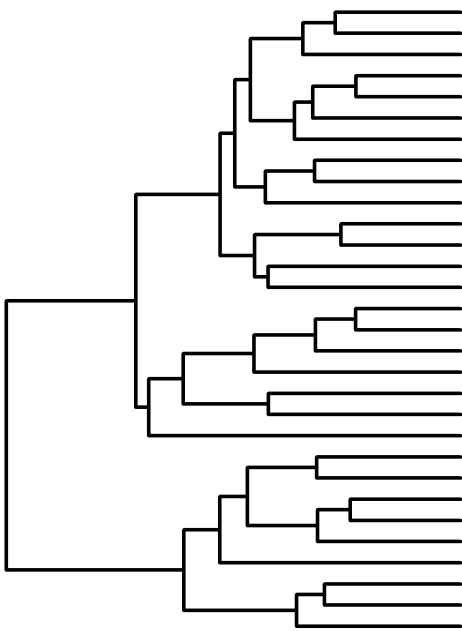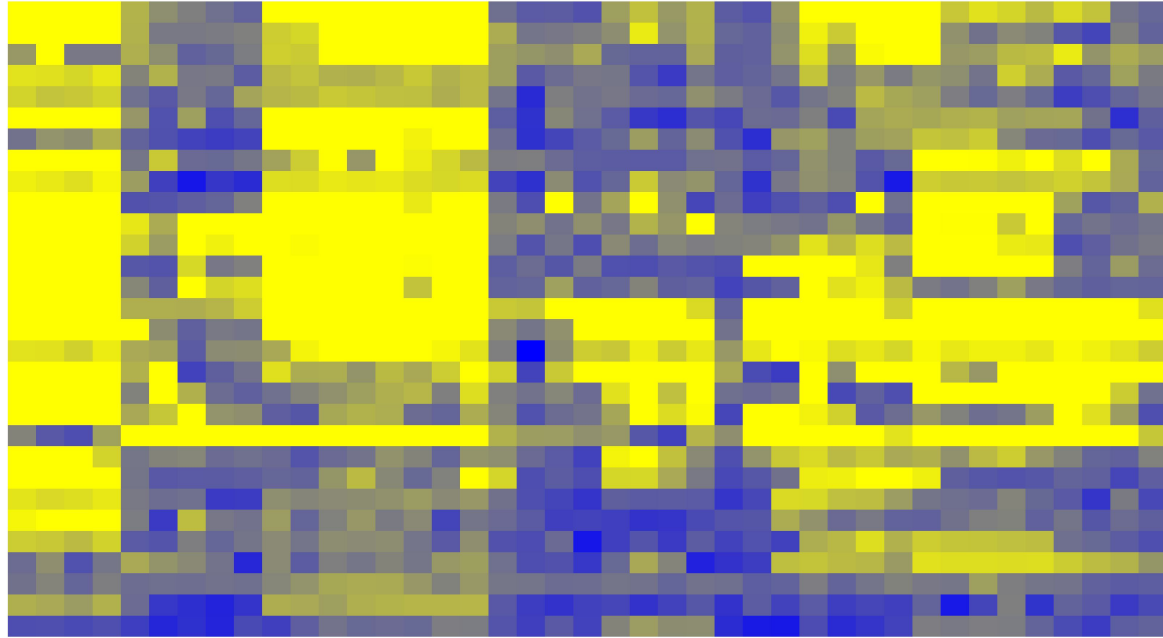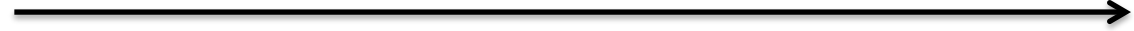

Peptides

Subjects

- D107
- D78
- D80
- D74
- D77
- D66
- D63
- D98
- D67
- D70
- D82
- D81
- D61
- D103
- D48
- D70B
- D71
- D44
- D19
- D114
- D64
- D105
- D65
- D69
- D68
- D60
- D50
- D72
- D59
- D53

Supplement: NIHMS692814-supplement-q.pdf [file NIHMS692814-supplement-q.pdf]

**B**

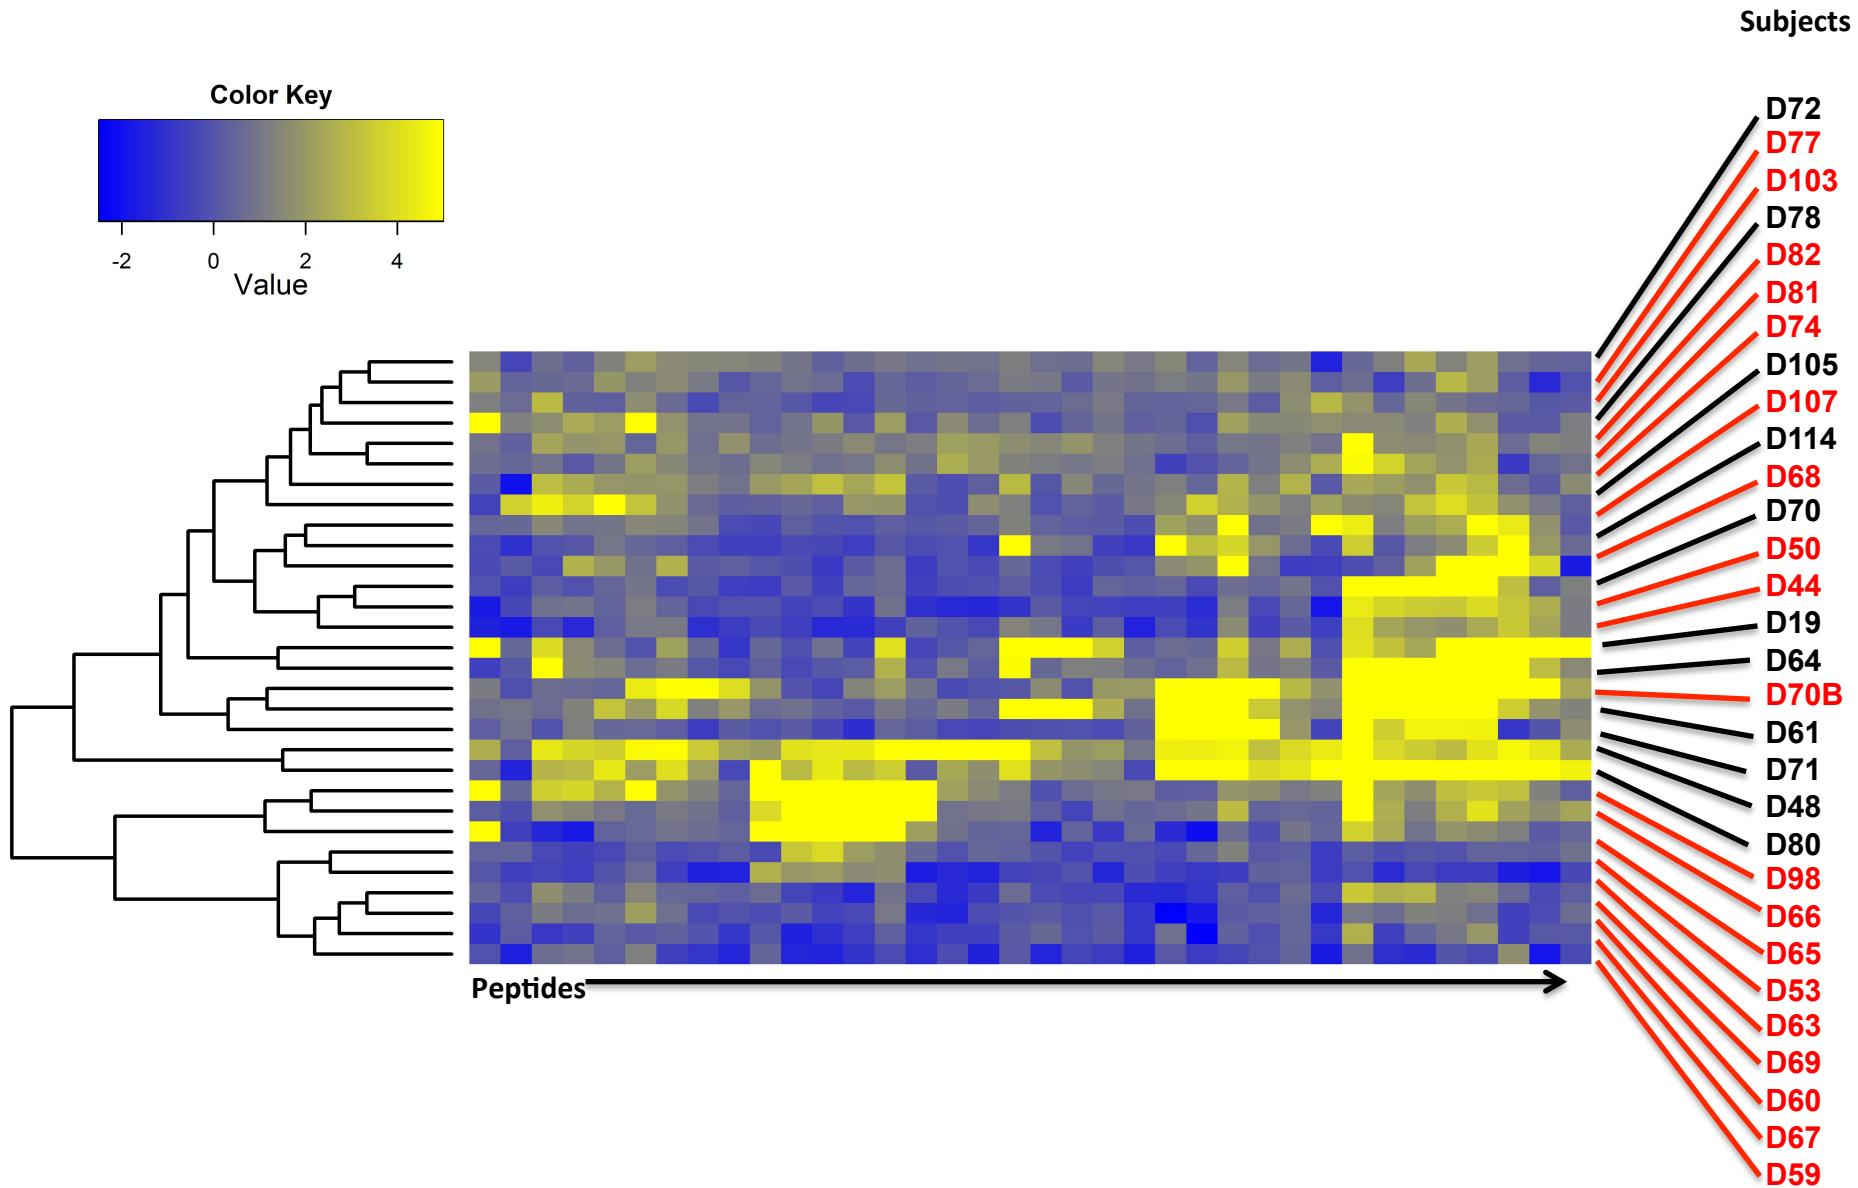

Supplement: NIHMS692814-supplement-r.pdf [file NIHMS692814-supplement-r.pdf]

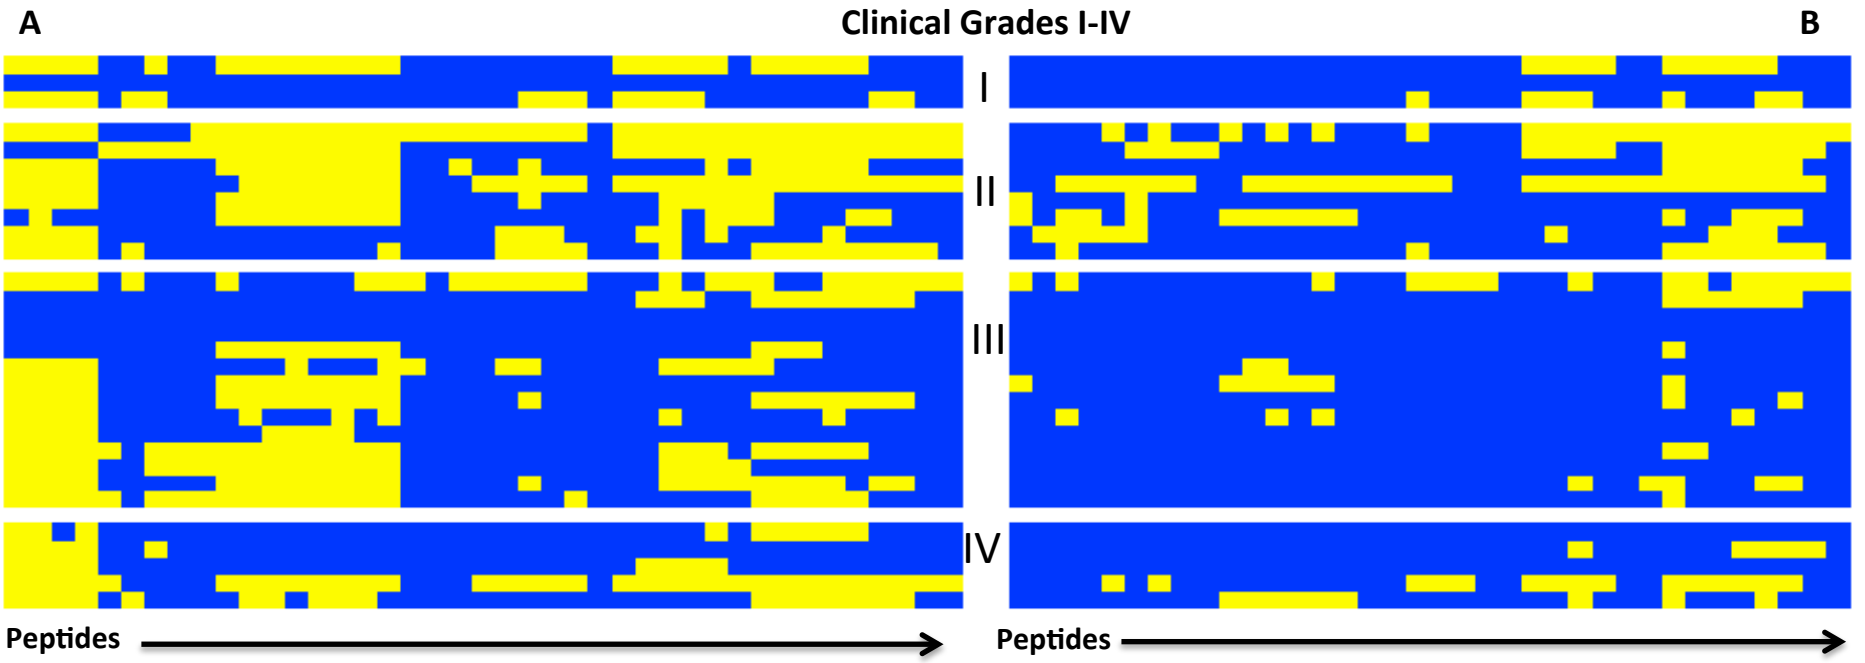

Supplement: NIHMS692814-supplement-s.pdf [file NIHMS692814-supplement-s.pdf]

A

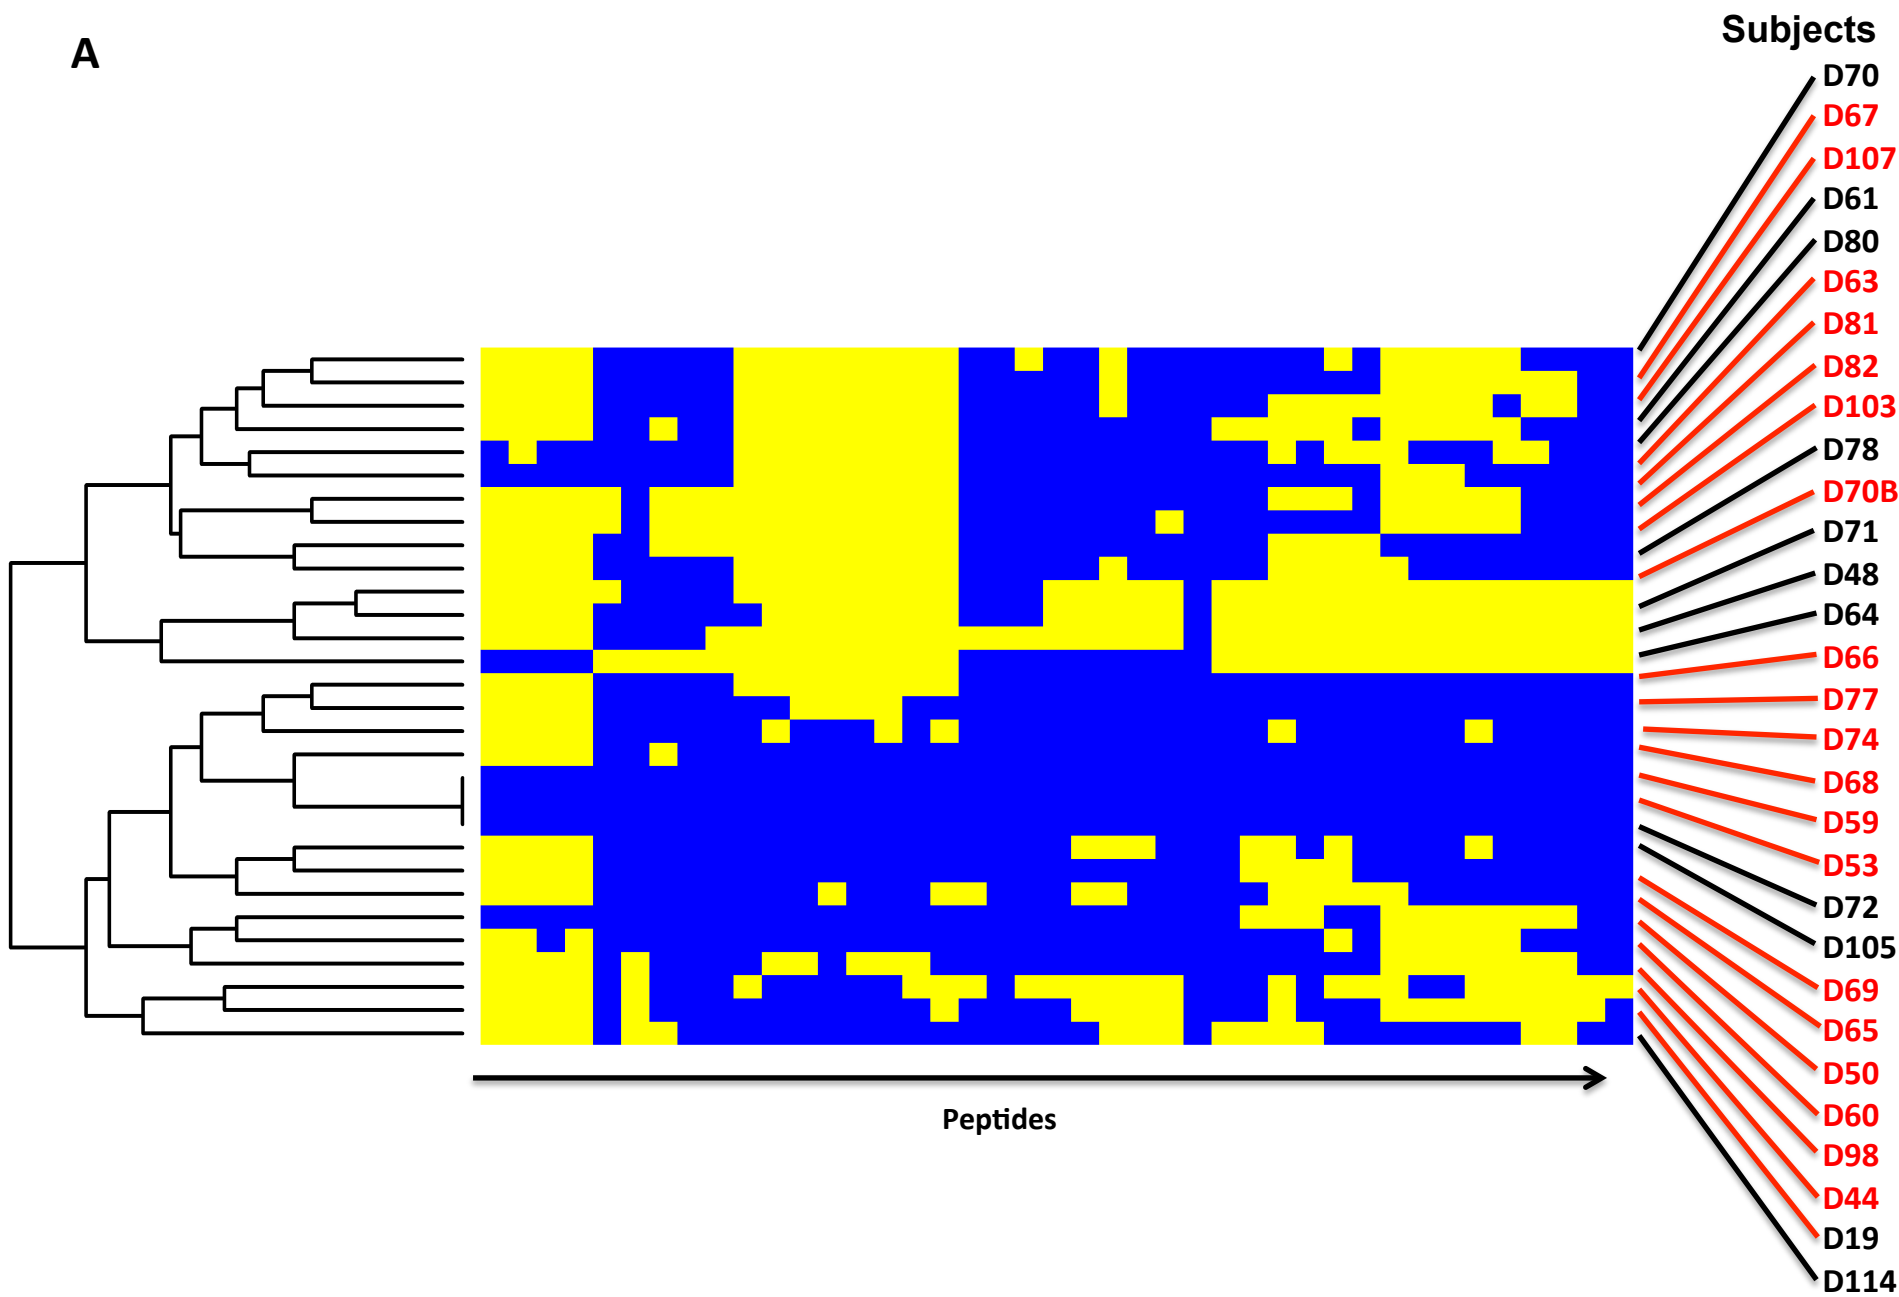

Supplement: NIHMS692814-supplement-t.pdf [file NIHMS692814-supplement-t.pdf]

**B**

**Subjects**

- D64
- D61
- D70B
- D48
- D44
- D71
- D70
- D50
- D19
- D107
- D68
- D114
- D82
- D63
- D59
- D53
- D60
- D69
- D72
- D77
- D103
- D67
- D81
- D65
- D78
- D74
- D105
- D98
- D66
- D80

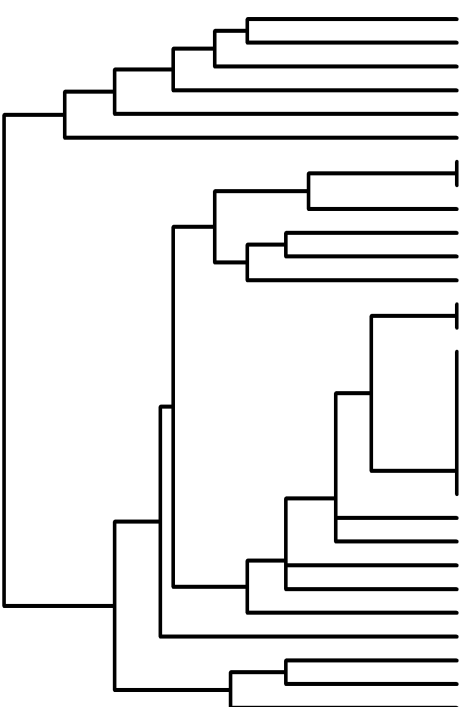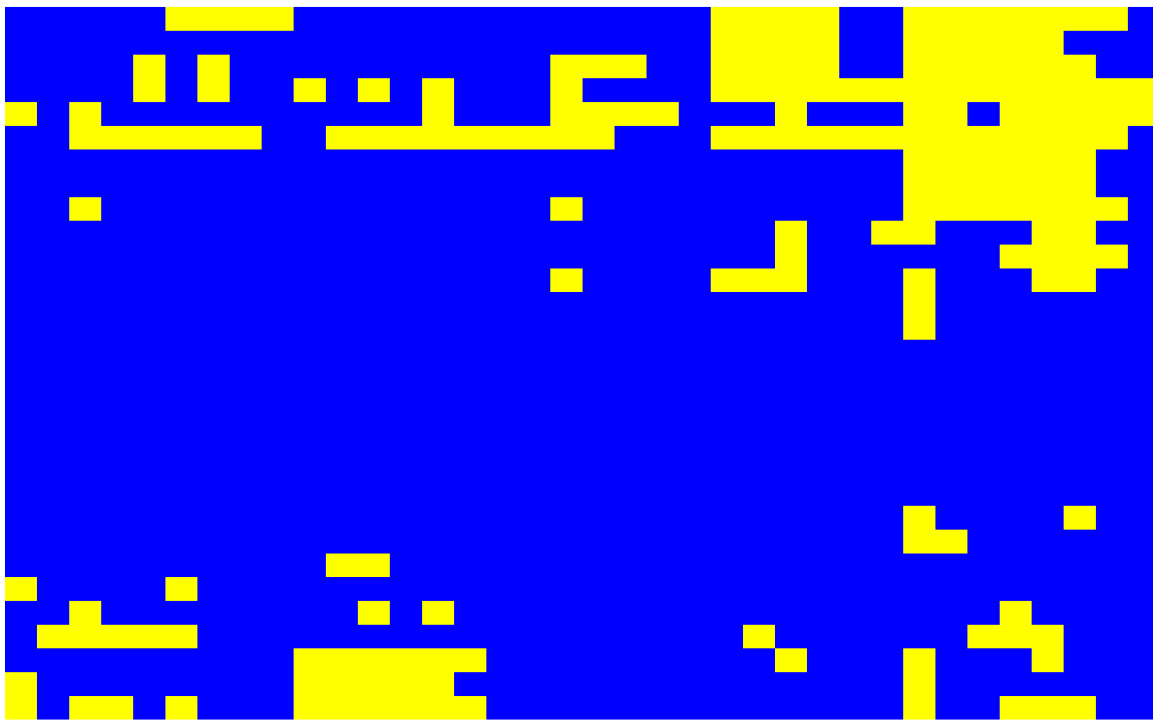

**Peptides**

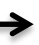

Supplement: NIHMS692814-supplement-u.pdf [file NIHMS692814-supplement-u.pdf]
